# Supplementary material
Source: PubMed Central journal article supplement (PMC4131176)
Supplement: cdd201459x2.pdf [file cdd201459x2.pdf]

**The PI3K regulatory subunits p55 $\alpha$  and p50 $\alpha$  regulate cell death *in vivo***

Sara Pensa, Kevin Neoh, Henrike K Resemann, Peter A Kreuzaler, Kathrine Abell, Neil J Clarke, Thomas Reinheckel, C Ronald Kahn and  
Christine J Watson

**SUPPLEMENTARY TABLES**

## Supplementary Table 1

Top 20 genes upregulated in the  $p55\alpha^{-/-}/p50\alpha^{-/-}$  mice

| Gene Symbol   | Definition                                                                                               | Fold change | FDR <sup>a</sup> |
|---------------|----------------------------------------------------------------------------------------------------------|-------------|------------------|
| <b>Spp1</b>   | Mus musculus secreted phosphoprotein 1 (Spp1), mRNA.                                                     | 6.6519      | 0.4535           |
| 2210415K03Rik | -                                                                                                        | 3.8412      | 0.4836           |
| Saa1          | Mus musculus serum amyloid A 1 (Saa1), mRNA.                                                             | 3.6535      | 0.4585           |
| <b>Saa2</b>   | Mus musculus serum amyloid A 2 (Saa2), mRNA.                                                             | 3.4667      | 0.4903           |
| LOC268393     | Mus musculus similar to 40S ribosomal protein S2 (LOC268393), mRNA.                                      | 2.9547      | 0.6513           |
| Csnd          | casein delta                                                                                             | 2.7674      | 0.5711           |
| Csnd          | casein delta                                                                                             | 2.7355      | 0.5574           |
| Saa3          | Mus musculus serum amyloid A 3 (Saa3), mRNA.                                                             | 2.5693      | 0.5002           |
| Sfrp1         | Mus musculus secreted frizzled-related sequence protein 1 (Sfrp1), mRNA.                                 | 2.5581      | 0.4835           |
| Lao1          | Mus musculus L-amino acid oxidase 1 (Lao1), mRNA.                                                        | 2.4390      | 0.4896           |
| 3300001A09Rik | Mus musculus RIKEN cDNA 3300001A09 gene (3300001A09Rik), mRNA.                                           | 2.2795      | 0.5154           |
| Slc28a3       | Mus musculus solute carrier family 28 (sodium-coupled nucleoside transporter), member 3 (Slc28a3), mRNA. | 2.1301      | 0.4876           |
| Cdc42ep3      | Mus musculus CDC42 effector protein (Rho GTPase binding) 3 (Cdc42ep3), mRNA.                             | 2.0982      | 0.4322           |
| Lrg1          | Mus musculus leucine-rich alpha-2-glycoprotein 1 (Lrg1), mRNA.                                           | 2.0333      | 0.3611           |
| Ppfbp1        | PTPRF interacting protein, binding protein 1 (liprin beta 1)                                             | 2.0172      | 0.5491           |
| <b>Tlr2</b>   | Mus musculus toll-like receptor 2 (Tlr2), mRNA.                                                          | 2.0065      | 0.5857           |
| Idb2          | Mus musculus inhibitor of DNA binding 2 (Idb2), mRNA.                                                    | 1.9944      | 0.3317           |
| Ccl9          | Mus musculus chemokine (C-C motif) ligand 9 (Ccl9), mRNA.                                                | 1.9791      | 0.5202           |
| Gjb6          | Mus musculus gap junction membrane channel protein beta 6 (Gjb6), mRNA.                                  | 1.9701      | 0.3337           |
| AU040576      | Mus musculus expressed sequence AU040576 (AU040576), mRNA.                                               | 1.9063      | 0.4384           |

<sup>a</sup> FDR, false discovery rate

Supplementary Table 2

Top 20 genes downregulated in the *p55α<sup>-/-</sup>/p50α<sup>-/-</sup>* mice

| Gene Symbol   | Definition                                                                                                | Fold change | FDR <sup>a</sup> |
|---------------|-----------------------------------------------------------------------------------------------------------|-------------|------------------|
| Pik3r1        | Mus musculus phosphatidylinositol 3-kinase, regulatory subunit, polypeptide 1 (p85 alpha) (Pik3r1), mRNA. | 0.2084      | 0.3716           |
| Rnase1        | Mus musculus ribonuclease, RNase A family, 1 (pancreatic) (Rnase1), mRNA.                                 | 0.2819      | 0.4622           |
| 1600029D21Rik | Mus musculus RIKEN cDNA 1600029D21 gene (1600029D21Rik), mRNA.                                            | 0.3476      | 0.5419           |
| Actb          | Mus musculus actin, beta, cytoplasmic (Actb), mRNA.                                                       | 0.3501      | 0.5785           |
| 9130229N11    | -                                                                                                         | 0.3513      | 0.3686           |
| Hmox1         | Mus musculus heme oxygenase (decycling) 1 (Hmox1), mRNA.                                                  | 0.3566      | 0.5731           |
| <b>Synpo</b>  | Mus musculus synaptopodin (Synpo), mRNA.                                                                  | 0.4123      | 0.4414           |
|               | Murine leukemia virus                                                                                     | 0.4198      | 0.4481           |
| Mt2           | Mus musculus metallothionein 2 (Mt2), mRNA.                                                               | 0.4580      | 0.3576           |
| 1810028F09Rik | -                                                                                                         | 0.4616      | 0.4352           |
| Sorl1         | Mus musculus sortilin-related receptor, LDLR class A repeats-containing (Sorl1), mRNA.                    | 0.4656      | 0.5092           |
| Arrdc3        | Mus musculus arrestin domain containing 3 (Arrdc3), mRNA.                                                 | 0.4698      | 0.5418           |
| Ccng2         | Mus musculus cyclin G2 (Ccng2), mRNA.                                                                     | 0.4792      | 0.5943           |
| A330031N05Rik | mitogen inducible gene mig-2 homolog [Homo sapiens]                                                       | 0.4851      | 0.5002           |
| C920004C08Rik | -                                                                                                         | 0.4865      | 0.5429           |
| Dscr1         | Mus musculus Down syndrome critical region homolog 1 (human) (Dscr1), mRNA.                               | 0.4901      | 0.3317           |
| 2310032D16Rik | Mus musculus RIKEN cDNA 2310032D16 gene (2310032D16Rik), mRNA.                                            | 0.4929      | 0.4821           |
| <b>Slpi</b>   | Mus musculus secretory leukocyte protease inhibitor (Slpi), mRNA.                                         | 0.5013      | 0.4121           |
| A030010B06Rik | -                                                                                                         | 0.5135      | 0.3641           |
| Grb7          | Mus musculus growth factor receptor bound protein 7 (Grb7), mRNA.                                         | 0.5245      | 0.4460           |

<sup>a</sup> FDR, false discovery rate

Supplementary Table 3

Comparison of differentially regulated genes in 24h involution  $p55\alpha^{-}/p50\alpha^{-}$  and  $Stat3^{-}$  mammary glands

| Ranking in<br>$p55\alpha^{-}/p50\alpha^{-}$ | Fold change in<br>$p55\alpha^{-}/p50\alpha^{-}$ | Symbol       | Definition                                                                     | Ranking in<br>$Stat3^{-}$ |
|---------------------------------------------|-------------------------------------------------|--------------|--------------------------------------------------------------------------------|---------------------------|
| <i>Downregulated</i>                        |                                                 |              |                                                                                |                           |
| 6                                           | -2.8                                            | Hmox1        | Heme oxygenase (decycling) 1                                                   | 26                        |
| 7                                           | -2.43                                           | <b>Synpo</b> | Synaptopodin                                                                   | 54                        |
| 11                                          | -2.15                                           | Sorl1        | Sortilin-related receptor, LDLR class A repeats-containing                     | 730                       |
| 18                                          | -1.99                                           | <b>Slpi</b>  | Secretory leukocyte protease inhibitor                                         | 5                         |
| 22                                          | -1.86                                           | Sbsn         | Mus musculus suprabasin (Sbsn), mRNA                                           | 3                         |
| 29                                          | -1.76                                           | Kcnj15       | Potassium inwardly-rectifying channel, subfamily J, member 15                  | 19                        |
| 38                                          | -1.69                                           | Sorl1        | Sortilin-related receptor, LDLR class A repeats-containing                     | 559                       |
| 46                                          | -1.65                                           | Chi3l1       | Chitinase 3-like 1                                                             | 43                        |
| 47                                          | -1.65                                           | Angptl4      | Angiopoetin-like 4                                                             | 18                        |
| 66                                          | -1.57                                           | Cyp2d22      | Cytochrome P450, family 2, subfamily d, polypeptide 22                         | 23                        |
| 69                                          | -1.57                                           | Hspb8        | Heat shock 27kDa protein 8                                                     | 20                        |
| <i>Upregulated</i>                          |                                                 |              |                                                                                |                           |
| 2                                           | 6.65                                            | <b>Spp1</b>  | Secreted phosphoprotein 1                                                      | 51                        |
| 7                                           | 2.77                                            | Csnd         | Casein delta                                                                   | 52                        |
| 11                                          | 2.44                                            | Lao1         | L-amino acid oxidase 1                                                         | 136                       |
| 15                                          | 2.03                                            | Lrg1         | Leucin-rich alpha-2-glycoprotein 1                                             | 4                         |
| 16                                          | 2.02                                            | Ppfibp1      | PTPRF interacting protein, binding protein 1 (liprin beta 1)                   | 916                       |
| 18                                          | 1.99                                            | Idb2         | Inhibitor of DNA binding 2                                                     | 132                       |
| 22                                          | 1.87                                            | B2m          | Mus musculus beta-2 microglobulin (B2m), mRNA                                  | 120                       |
| 26                                          | 1.76                                            | Daam1        | Dishevelled associated activator of morphogenesis 1                            | 86                        |
| 30                                          | 1.72                                            | Slc7a5       | Solute carrier family 7 (cationic amino acid transporter, y+ system), member 5 | 7                         |
| 37                                          | 1.66                                            | Gyk          | Glycerol kinase                                                                | 106                       |
| 39                                          | 1.65                                            | Ceacam10     | CEA-related cell adhesion molecule 10                                          | 324                       |
| 41                                          | 1.65                                            | Folr1        | Folate receptor 1                                                              | 45                        |
| 43                                          | 1.63                                            | G0s2         | G0/G1 switch gen 2                                                             | 64                        |
| 44                                          | 1.62                                            | Orm1         | Orsomuroid 1                                                                   | 2                         |
| 50                                          | 1.58                                            | Orm2         | Orsomuroid 2                                                                   | 1                         |
